# Supplementary material
Source: PubMed Central journal article supplement (PMC524346)
Supplement: 7600413s2.pdf [file 7600413s2.pdf]

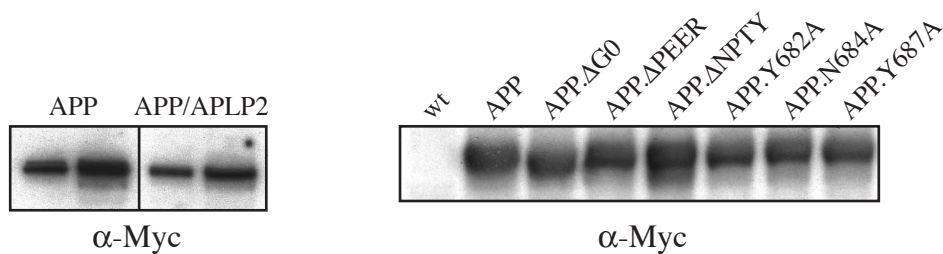

**Supplementary Figure 2** Expression levels of APP, APP/APLP2 and mutated APP constructs

APP and the APP/APLP2-chimera have identical Myc-tagged N-termini but show a striking difference in the induction of Notch gain-of-function phenotypes during MSO development due to their different C-terminal domains. APP induces very weak phenotypes in comparison to the APP/APLP2 chimera. To make sure that the ratio in protein expression levels induced by *sca*-GAL4 during MSO development is not significantly different from the results obtained with GMR-GAL4, a western blot analysis from dissected pupal tissue was performed. As displayed, no significant differences in the expression or stability of APP and APP/APLP2 could be detected. Homogenates of five and ten dissected pupal nota were loaded. Also transgenic lines used for the enhancement assays have comparable protein expression levels as revealed by western blot analysis with GMR-GAL4.
