# Supplementary material
Source: PubMed Central journal article supplement (PMC524346)
Supplement: 7600413s7.pdf [file 7600413s7.pdf]

| Figure | Chrom. I          | Chromosome II and III                                                                                                                                                                                                                 | Temp. °C                                                                                                 |
|--------|-------------------|---------------------------------------------------------------------------------------------------------------------------------------------------------------------------------------------------------------------------------------|----------------------------------------------------------------------------------------------------------|
| Fig. 1 | A                 | w <sup>1118</sup> / w <sup>1118</sup> + / + ; + / +                                                                                                                                                                                   | 25                                                                                                       |
|        | B                 | <i>ap</i> -GAL4 / UAS- <i>APLP2-I</i> ; + / +                                                                                                                                                                                         | 25                                                                                                       |
|        | C                 | <i>sca</i> -GAL4 / UAS- <i>APLP2-I</i> ; + / +                                                                                                                                                                                        | 25                                                                                                       |
| Fig. 2 | B                 | <i>sca</i> -GAL4 <i>AsEs</i> -EGFP / UAS- <i>lacZ</i> or UAS- <i>APP</i> or UAS-.... on II <sup>d</sup> or III <sup>d</sup>                                                                                                           | 25/29                                                                                                    |
|        | C/D               | <i>sca</i> -GAL4 <i>AsEs</i> -EGFP / UAS- <i>lacZ</i> or UAS- <i>APP</i> or UAS-.... on II <sup>d</sup> or III <sup>d</sup>                                                                                                           | 25                                                                                                       |
|        | E                 | <i>sca</i> -GAL4 / UAS- <i>APP</i> ; UAS- <i>APP</i> / +                                                                                                                                                                              | 28                                                                                                       |
|        | E                 | <i>sca</i> -GAL4 / UAS- <i>APP/APLP2</i> ; + / +                                                                                                                                                                                      | 25                                                                                                       |
|        | E                 | <i>sca</i> -GAL4 / UAS- <i>APP/APLP2</i> ; UAS- <i>APP/APLP2</i> / +                                                                                                                                                                  | 25                                                                                                       |
| Fig. 3 | A-a               | <i>sca</i> -GAL4 / + ; + / +                                                                                                                                                                                                          | 25/29                                                                                                    |
|        | A-b               | <i>sca</i> -GAL4 / + ; <i>H</i> <sup>P8</sup>                                                                                                                                                                                         | 25/29                                                                                                    |
|        | A-c               | <i>numb</i> <sup>15</sup> FRT40A <i>sca</i> -GAL4 / + ; + / +                                                                                                                                                                         | 25/29                                                                                                    |
|        | A-d               | <i>N</i> <sup>sp1-1</sup> / Y <i>sca</i> -GAL4 / + ; + / +                                                                                                                                                                            | 25/29                                                                                                    |
|        | A-e               | <i>sca</i> -GAL4 <i>Su(H)</i> <sup>SF8</sup> / +                                                                                                                                                                                      | 25/29                                                                                                    |
|        | A-f               | <i>N</i> <sup>5Se11</sup> / w <sup>1118</sup> <i>sca</i> -GAL4 / + ; + / +                                                                                                                                                            | 25/29                                                                                                    |
|        | A-a 2x <i>APP</i> | <i>sca</i> -GAL4 / UAS- <i>APP</i> ; UAS- <i>APP</i> / +                                                                                                                                                                              | 25/29                                                                                                    |
|        | A-b 2x <i>APP</i> | <i>sca</i> -GAL4 / UAS- <i>APP</i> ; <i>H</i> <sup>P8</sup> / UAS- <i>APP</i>                                                                                                                                                         | 25/29                                                                                                    |
|        | A-c 2x <i>APP</i> | <i>numb</i> <sup>15</sup> FRT40A <i>sca</i> -GAL4 / UAS- <i>APP</i> ; UAS- <i>APP</i> / +                                                                                                                                             | 25/29                                                                                                    |
|        | C                 | <i>N</i> <sup>ts1</sup> / Y <i>sca</i> -GAL4 / + ; + / +                                                                                                                                                                              | 21+29                                                                                                    |
|        | C                 | <i>N</i> <sup>ts1</sup> / Y <i>sca</i> -GAL4 / UAS- <i>APLP2-I</i> ; + / +                                                                                                                                                            | 21+29                                                                                                    |
|        | D                 | <i>sca</i> -GAL4 / UAS- <i>numb</i> ; + / +                                                                                                                                                                                           | 21                                                                                                       |
|        | D                 | <i>sca</i> -GAL4 UAS- <i>APP/APLP2</i> / UAS- <i>Numb</i> UAS- <i>APP/APLP2</i> ; + / +                                                                                                                                               | 21                                                                                                       |
|        | D                 | <i>sca</i> -GAL4 UAS- <i>APLP2</i> / UAS- <i>APLP2</i> ; + / +                                                                                                                                                                        | 21                                                                                                       |
|        | Fig. 4            | B                                                                                                                                                                                                                                     | <i>sca</i> -GAL4 UAS- <i>APP/APLP2</i> / UAS- <i>lacZ</i> ; + / +                                        |
| B      |                   | <i>sca</i> -GAL4 UAS- <i>APP/APLP2</i> / UAS- <i>APP</i> or UAS- <i>APP</i> .... on II <sup>d</sup> or III <sup>d</sup>                                                                                                               | 25/29                                                                                                    |
| C      |                   | <i>sca</i> -GAL4 UAS- <i>APP/APLP2</i> / UAS- <i>GFP</i> ; UAS- <i>lacZ</i> / +                                                                                                                                                       | 25                                                                                                       |
| C      |                   | <i>sca</i> -GAL4 UAS- <i>APP/APLP2</i> / UAS- <i>APP</i> .□ <i>NPTY</i> ; UAS- <i>APP</i> .□ <i>NPTY</i> / +                                                                                                                          | 25                                                                                                       |
| D      |                   | <i>sca</i> -GAL4 UAS- <i>GFP</i> / UAS- <i>lacZ</i> ; + / +                                                                                                                                                                           | 29                                                                                                       |
| D      |                   | <i>sca</i> -GAL4 / + ; UAS- <i>APP</i> .□ <i>NPTY</i> UAS- <i>APP</i> .□ <i>NPTY</i> / +                                                                                                                                              | 29                                                                                                       |
| Fig. 5 | D                 | <i>sca</i> -GAL4 x 2xUAS- <i>APP</i> or 2x UAS- <i>APP/APLP2</i> or 2x UAS- <i>APP</i> .□ <i>NPTY</i>                                                                                                                                 | 25/29                                                                                                    |
|        | E                 | <i>sca</i> -GAL4 / UAS- <i>APP</i> ; UAS- <i>Pon.GFP</i> / +                                                                                                                                                                          | 25                                                                                                       |
|        | F                 | <i>sca</i> -GAL4 UAS- <i>dab-5A</i> / + ; UAS- <i>numb.PTB-lacZ</i> / +                                                                                                                                                               | 25                                                                                                       |
|        | G                 | <i>sca</i> -GAL4 UAS- <i>dab-5A</i> / UAS- <i>APP</i> ; + / +                                                                                                                                                                         | 25                                                                                                       |
|        | H                 | <i>sca</i> -GAL4 / UAS- <i>lacZ</i> ; + / +                                                                                                                                                                                           | 25                                                                                                       |
|        | H                 | <i>sca</i> -GAL4 / UAS- <i>APP/APLP2</i> ; + / +                                                                                                                                                                                      | 25                                                                                                       |
|        | H                 | <i>sca</i> -GAL4 / UAS- <i>dab-2</i> ; + / +                                                                                                                                                                                          | 25                                                                                                       |
|        | H                 | <i>sca</i> -GAL4 UAS- <i>APP/APLP2</i> / UAS- <i>dab-2</i> ; + / +                                                                                                                                                                    | 25                                                                                                       |
|        | H                 | <i>sca</i> -GAL4 / UAS- <i>APP/APLP2</i> ; + / +                                                                                                                                                                                      | 28                                                                                                       |
|        | H                 | <i>sca</i> -GAL4 UAS- <i>dab.RNAi</i> / UAS- <i>APP/APLP2</i> ; + / +                                                                                                                                                                 | 28                                                                                                       |
|        | Fig. 6            | B                                                                                                                                                                                                                                     | <i>sca</i> -GAL4 / UAS- <i>appl</i> or <i>appl.sd</i> or UAS-.... on II <sup>d</sup> or III <sup>d</sup> |
| C      |                   | <i>sca</i> -GAL4 / UAS- <i>appl.sd</i> ; + / +                                                                                                                                                                                        | 25                                                                                                       |
| C      |                   | <i>sca</i> -GAL4 / UAS- <i>appl.sd</i> ; <i>H</i> <sup>P8</sup> / +                                                                                                                                                                   | 25                                                                                                       |
| C      |                   | <i>numb</i> <sup>15</sup> FRT40A <i>sca</i> -GAL4 / UAS- <i>appl.sd</i> ; + / +                                                                                                                                                       | 25                                                                                                       |
| C      |                   | <i>N</i> <sup>sp1-1</sup> / Y <i>sca</i> -GAL4 / UAS- <i>appl.sd</i> ; + / +                                                                                                                                                          | 25                                                                                                       |
| C      |                   | <i>N</i> <sup>5Se11</sup> / w <sup>1118</sup> <i>sca</i> -GAL4 / UAS- <i>appl.sd</i> ; + / +                                                                                                                                          | 25                                                                                                       |
| D      |                   | <i>sca</i> -GAL4 / UAS- <i>appl</i> ; + / +                                                                                                                                                                                           | 25                                                                                                       |
| D      |                   | <i>sca</i> -GAL4 / UAS- <i>appl.sd</i> ; + / +                                                                                                                                                                                        | 25                                                                                                       |
| E      |                   | <i>sca</i> -GAL4 / UAS- <i>appl</i> ; UAS- <i>Pon.GFP</i> / +                                                                                                                                                                         | 25                                                                                                       |
| F      |                   | <i>hs</i> -FLP <i>numb</i> <sup>15</sup> FRT40A <i>sca</i> -GAL4 / <i>arm</i> -LacZ FRT40A ; UAS- <i>appl</i> / + clones: <i>numb</i> <sup>15</sup> FRT40A <i>sca</i> -GAL4 / <i>numb</i> <sup>15</sup> FRT40A ; UAS- <i>appl</i> / + | 25+37                                                                                                    |
| Fig. 7 | A                 | <i>appl</i> <sup>d</sup> / Y                                                                                                                                                                                                          | 25                                                                                                       |
|        | A                 | <i>appl</i> <sup>d</sup> / Y UAS- <i>appl</i> / + ; <i>Act5C</i> -GAL4 / +                                                                                                                                                            | 25                                                                                                       |
|        | A                 | w <sup>1118</sup> / Y <i>sca</i> -GAL4 / UAS- <i>appl.RNAi</i> ; + / +                                                                                                                                                                | 29                                                                                                       |

**Supplementary Table I** Overview of the genotypes used or generated to collect the data displayed in Figures 1-7 of *Mertes et al.* Crosses were performed at the indicated temperatures in tightly regulated incubators with 50-70% humidity on standard *Drosophila* medium. The flies of each cross were transferred to new vials several times to increase the number of offsprings, and the offsprings from the first vial usually were never used for statistical analysis. Recombinants between *sca*-GAL4 and UAS-constructs displaying bristle phenotypes were only used for 2-3 months. If not otherwise indicated, w<sup>1118</sup> was present on the X chromosome.
