# Supplementary material
Source: PubMed Central journal article supplement (PMC524346)
Supplement: 7600413s8.pdf [file 7600413s8.pdf]

| <b>Figure</b> | <b>Antibody</b>                        | <b>Species</b>             | <b>Source</b>                           |
|---------------|----------------------------------------|----------------------------|-----------------------------------------|
| Fig. 2 A      | □-APLP1 42464<br>□-APLP2 CT12<br>□-Myc | rabbit<br>rabbit<br>rabbit | G. Multhaup<br>Calbiochem<br>Santa Cruz |
| Fig. 2 E      | □-Elav<br>□-Prospero                   | rat<br>mouse               | DSHB<br>DSHB                            |
| Fig. 5 C      | □-APP<br>□-V5                          | rabbit<br>mouse            | G. Multhaup<br>Invitrogen               |
| Fig. 5 D      | □-Myc<br>□-Pon                         | rabbit<br>rabbit           | Santa Cruz<br>YN Jan                    |
| Fig. 5 E      | □-Myc                                  | mouse                      | Roche                                   |
| Fig. 5 F      | □-Dab<br>□-LacZ                        | rabbit<br>mouse            | F. Fogerty<br>Roche                     |
| Fig. 5 G      | □-Myc<br>□-Dab                         | mouse<br>rabbit            | Roche<br>F. Fogerty                     |
| Fig. 6 A      | □- <i>appl</i>                         | rabbit                     | K. White                                |
| Fig. 6 D      | □-APPL                                 | rabbit                     | K. White                                |
| Fig. 6 E      | □-APPL                                 | rabbit                     | K. White                                |
| Fig. 6 A      | □-APPL                                 | rabbit                     | K. White                                |
| Fig. 7 B      | □-Elav                                 | rat                        | DSHB                                    |

**Supplementary Table II** Overview of the antibodies used or generated to collect the data displayed in Figures 1-7 of *Merdes et al.* Secondary antibodies (highly cross-absorbed) coupled to Alexa-dyes or Cy3 have been obtained from Molecular Probes and Dianova.
